# Supplementary material
Source: Research Square preprint supplement (doi:10.21203/rs.3.rs-9459775/v1)
Supplement: Supplementary file 1 [file f6d1ebb6b7846197ff44007e.docx]

| **Variable** | **Categories** | **2007** | **2011** | **2016** | **2021** |
| --- | --- | --- | --- | --- | --- |
| **Age categories (year)** | 25-34 | 101 (6.1) | 22 (3.8) | 63 (4.5) | 65 (3.7) |
| 35-44 | 259 (15.6) | 58 (10.1) | 178 (12.8) | 258 (14.9) |
| 45-54 | 563 (34) | 171 (29.8) | 477 (34.4) | 576 (33.2) |
| 55-64 | 734 (44.3) | 322 (56.2) | 670 (48.3) | 838 (48.2) |
| **Area** | Rural | 542 (32.7) | 149 (26) | 365 (26.3) | 414 (23.8) |
| Urban | 1115 (67.3) | 424 (74) | 1023 (73.7) | 1323 (76.2) |
| **Sex** | Female | 944 (57) | 367 (64) | 819 (59) | 1063 (61.2) |
| Male | 713 (43) | 206 (36) | 569 (41) | 674 (38.8) |
| **Total** | Total | 1657 | 573 | 1388 | 1737 |
| Data are presented as number (percent) | | | | | |

**Table 1:** Baseline characteristics of Iranian adults with diabetes from 2007 to 2021

|  | | **2007** | | **2011** | | **2016** | | **2021** | | **p-value for trend** | **Annual rate change (%)** | **p-value for trend (adjusted)** | **Annual rate change (adjusted) (%)** |
| --- | --- | --- | --- | --- | --- | --- | --- | --- | --- | --- | --- | --- | --- |
| **Prevalence** | | **Crude** | **Standardized** | **Crude** | **Standardized** | **Crude** | **Standardized** | **Crude** | **Standardized** |
| **Age categories (year)** | 25-34 | 2.97 (2.04-3.91) | 3.09 (2.22-3.96) | 1.67 (0.93-2.42) | 1.76 (0.97-2.55) | 1.47 (1.07-1.87) | 1.45 (1.04-1.85) | 2.1 (1.47-2.73) | 2.02 (1.39-2.64) | 0.023 | -2.7 (-4.97 to -0.38) | 0.018 | -2.84 (-5.13 to -0.5) |
| 35-44 | 6.2 (5.06-7.33) | 6.26 (5.07-7.45) | 5.65 (4.02-7.27) | 5.81 (4.11-7.5) | 3.97 (3.33-4.61) | 4.03 (3.35-4.71) | 5.72 (4.66-6.78) | 5.64 (4.6-6.69) | 0.753 | -0.2 (-1.47 to 1.07) | 0.434 | -0.51 (-1.78 to 0.78) |
| 45-54 | 12.54 (10.88-14.19) | 12.79 (11.05-14.54) | 16.79 (13.98-19.6) | 16.74 (13.85-19.63) | 12.12 (10.84-13.39) | 12.1 (10.82-13.38) | 15.91 (14.29-17.53) | 15.62 (14-17.24) | 0.024 | 0.87 (0.11 to 1.64) | 0.26 | 0.44 (-0.32 to 1.21) |
| 55-64 | 16.45 (14.71-18.19) | 16.81 (14.96-18.66) | 22.55 (20.03-25.07) | 22.72 (20.22-25.23) | 21.86 (20.09-23.62) | 21.94 (20.14-23.74) | 26.83 (24.66-29) | 26.32 (24.19-28.46) | <0.0001 | 3.27 (2.65 to 3.89) | <0.0001 | 2.86 (2.24 to 3.49) |
| **Area** | Rural | 6.02 (4.98-7.06) | 6.08 (5.05-7.11) | 6.09 (4.86-7.33) | 5.97 (4.72-7.22) | 6.7 (5.99-7.41) | 5.69 (5.08-6.31) | 9.15 (8.15-10.15) | 7.2 (6.4-8) | 0.021 | 1.03 (0.16 to 1.91) | <0.0001 | 1.98 (1.13 to 2.84) |
| Urban | 8.23 (7.42-9.04) | 8.29 (7.51-9.06) | 9.95 (8.78-11.12) | 9.55 (8.47-10.64) | 9.89 (9.19-10.6) | 7.88 (7.33-8.43) | 12.93 (12-13.87) | 9.58 (8.87-10.29) | 0.018 | 0.66 (0.11 to 1.2) | <0.0001 | 1.05 (0.52 to 1.57) |
| **Sex** | Female | 7.78 (6.98-8.57) | 8.13 (7.3-8.95) | 9.58 (8.41-10.75) | 9.74 (8.58-10.9) | 9.55 (8.79-10.3) | 7.98 (7.36-8.6) | 12.49 (11.52-13.46) | 9.46 (8.72-10.19) | 0.002 | 0.95 (0.35 to 1.55) | <0.0001 | 1.37 (0.8 to 1.95) |
| Male | 7.26 (6.24-8.28) | 7.41 (6.43-8.38) | 7.91 (6.5-9.31) | 7.69 (6.38-9) | 8.23 (7.46-9) | 6.74 (6.1-7.38) | 11.33 (10.17-12.5) | 8.58 (7.7-9.46) | 0.001 | 1.18 (0.46 to 1.92) | 0.001 | 1.23 (0.52 to 1.95) |
| **Total** | Total | 7.53 (6.88-8.17) | 7.76 (7.12-8.4) | 8.82 (7.91-9.72) | 8.7 (7.83-9.58) | 8.96 (8.41-9.5) | 7.35 (6.91-7.8) | 11.99 (11.24-12.73) | 9.01 (8.44-9.59) | <0.0001 | 1.09 (0.63 to 1.56) | <0.0001 | 1.31 (0.87 to 1.76) |
| Data are presented as percentages (with 95% confidence intervals). | | | | | | | | | | | | | |

**Table 2:** Crude and standardized prevalence of diabetes in Iran from 2007 to 2021

|  | | **2007** | | **2011** | | **2016** | | **2021** | | **p-value for trend** | **Annual rate change (%)** | **p-value for trend (adjusted)** | **Annual rate change (adjusted) (%)** |
| --- | --- | --- | --- | --- | --- | --- | --- | --- | --- | --- | --- | --- | --- |
| **Prevalence** | | **Crude** | **Standardized** | **Crude** | **Standardized** | **Crude** | **Standardized** | **Crude** | **Standardized** |
| **Age categories (year)** | 25-34 | 10.97 (3.42-18.51) | 13.62 (5.71-21.54) | 4.81 (0-11.94) | 7.86 (-4.4-20.11) | 14.85 (5.98-23.71) | 15.03 (5.87-24.2) | 25.33 (11.99-38.68) | 19.23 (10.76-27.69) | 0.157 | 3.49 (-1.31 to 8.53) | 0.141 | 3.69 (-1.19 to 8.82) |
| 35-44 | 32.93 (24.6-41.26) | 32.46 (24.86-40.07) | 44.57 (29.87-59.28) | 43.53 (31.76-55.31) | 29.63 (22.31-36.95) | 27.81 (20.81-34.81) | 41.69 (31.4-51.97) | 37.64 (28.29-46.98) | 0.525 | -0.51 (-2.07 to 1.08) | 0.539 | -0.49 (-2.05 to 1.09) |
| 45-54 | 57.05 (50.22-63.88) | 56.41 (49.87-62.95) | 59.71 (50.82-68.6) | 56.22 (47.55-64.88) | 51.25 (45.55-56.96) | 50.4 (44.7-56.11) | 54.21 (48.59-59.82) | 51.92 (46.14-57.69) | 0.265 | -0.41 (-1.13 to 0.31) | 0.212 | -0.46 (-1.18 to 0.26) |
| 55-64 | 65.56 (60.07-71.05) | 63.9 (58.28-69.51) | 64.62 (58.59-70.65) | 64.38 (58.33-70.42) | 60.38 (55.74-65.01) | 59.54 (54.95-64.13) | 66.29 (61.52-71.06) | 65.72 (61.01-70.44) | 0.138 | 0.37 (-0.12 to 0.86) | 0.132 | 0.37 (-0.11 to 0.86) |
| **Area** | Rural | 47.3 (38.6-55.99) | 37.45 (30.06-44.84) | 49.36 (39.21-59.52) | 36.1 (29.23-42.98) | 53.4 (47.85-58.94) | 31.43 (25.46-37.41) | 56.59 (50.84-62.33) | 38.38 (30.6-46.16) | 0.876 | -0.06 (-0.83 to 0.71) | 0.778 | -0.11 (-0.84 to 0.63) |
| Urban | 46.24 (41.2-51.28) | 33.25 (28.52-37.98) | 56.16 (50.08-62.25) | 35.75 (28.32-43.19) | 50.94 (47.12-54.76) | 32.89 (27.88-37.89) | 57.18 (53.35-61.02) | 36.85 (31.62-42.07) | 0.174 | 0.34 (-0.15 to 0.84) | 0.677 | 0.1 (-0.37 to 0.58) |
| **Sex** | Female | 52.12 (46.86-57.38) | 35.95 (30.65-41.26) | 58.55 (52.28-64.83) | 46.69 (36.05-57.32) | 55.67 (51.41-59.93) | 36.19 (30.77-41.61) | 60.07 (56.06-64.07) | 35.91 (31.04-40.79) | 0.889 | 0.04 (-0.46 to 0.53) | 0.977 | -0.01 (-0.48 to 0.47) |
| Male | 40.07 (33.01-47.13) | 32.57 (26.56-38.57) | 49.3 (40.18-58.43) | 25.65 (19.7-31.6) | 45.46 (40.56-50.37) | 28.96 (22.92-35.01) | 52.76 (47.23-58.3) | 38.48 (31.22-45.74) | 0.259 | 0.42 (-0.31 to 1.15) | 0.7 | 0.14 (-0.58 to 0.86) |
| **Total** | Total | 46.51 (42.16-50.86) | 34.24 (30.23-38.26) | 54.78 (49.49-60.07) | 35.83 (29.84-41.83) | 51.47 (48.25-54.7) | 32.54 (28.47-36.6) | 57.07 (53.78-60.36) | 37.21 (32.82-41.6) | 0.308 | 0.22 (-0.2 to 0.63) | 0.822 | 0.05 (-0.35 to 0.45) |
| Data are presented as percentages (95% confidence interval). | | | | | | | | | | | | | |

**Table 3:** Crude and standardized prevalence of hypertension among Iranian adults with diabetes from 2007 to 2021

|  | | **2007** | | **2011** | | **2016** | | **2021** | | **p-value for trend** | **Annual rate change (%)** | **p-value for trend (adjusted)** | **Annual rate change (adjusted) (%)** |
| --- | --- | --- | --- | --- | --- | --- | --- | --- | --- | --- | --- | --- | --- |
| **Prevalence** | | **Crude** | **Standardized** | **Crude** | **Standardized** | **Crude** | **Standardized** | **Crude** | **Standardized** |
| **Age categories (years)** | **25-34** | 91.58 (86.48-96.69) | 92.7 (88.33-97.07) | 89.69 (75.72-100) | 87.98 (74.26-101.7) | 84.46 (75.03-93.89) | 85.86 (77.38-94.34) | 87.52 (78.38-96.67) | 84.26 (75.07-93.46) | 0.716 | 0.15 (-0.67 to 0.98) | 0.922 | -0.04 (-0.87 to 0.79) |
| **35-44** | 89.41 (83.69-95.13) | 89.01 (82.57-95.46) | 96.56 (92.52-100) | 97.31 (94.32-100.29) | 88.35 (82.93-93.78) | 88.11 (82.75-93.46) | 85.85 (77.24-94.45) | 85.69 (79.14-92.24) | 0.731 | -0.07 (-0.46 to 0.33) | 0.734 | -0.07 (-0.46 to 0.33) |
| **45-54** | 90.82 (86.99-94.65) | 90.19 (86.25-94.12) | 88.92 (83.28-94.56) | 85.2 (77.74-92.65) | 86.56 (81.8-91.33) | 86.68 (82.5-90.87) | 91.65 (88.93-94.36) | 91.41 (88.63-94.18) | 0.385 | -0.12 (-0.38 to 0.15) | 0.362 | -0.12 (-0.38 to 0.14) |
| **55-64** | 94.12 (92.19-96.05) | 94.12 (92.2-96.03) | 91 (87.59-94.41) | 90.35 (86.67-94.03) | 87.01 (83.67-90.34) | 86.56 (83.28-89.85) | 87.36 (84.27-90.46) | 87.72 (84.73-90.71) | <0.0001 | -0.42 (-0.65 to -0.19) | <0.0001 | -0.44 (-0.67 to -0.22) |
| **Area** | **Rural** | 91.5 (88.45-94.55) | 89.31 (84.1-94.53) | 92.9 (87.45-98.35) | 92.93 (87.75-98.11) | 87.46 (83.82-91.11) | 82.44 (74.21-90.67) | 88.95 (85.5-92.41) | 85.58 (80.63-90.52) | 0.167 | -0.22 (-0.52 to 0.09) | 0.076 | -0.27 (-0.57 to 0.03) |
| **Urban** | 91.4 (88.71-94.08) | 91.97 (88.94-94.99) | 90.62 (87.31-93.93) | 89.76 (83.03-96.49) | 86.75 (83.78-89.71) | 88.19 (84.36-92.02) | 88.52 (85.97-91.08) | 86.86 (81.8-91.92) | 0.009 | -0.24 (-0.42 to -0.06) | 0.006 | -0.25 (-0.43 to -0.07) |
| **Sex** | **Female** | 94.23 (92.06-96.39) | 94.86 (92.54-97.18) | 94.65 (92.25-97.05) | 95.53 (92.31-98.75) | 87.66 (84.08-91.25) | 88.52 (83.99-93.04) | 90 (87.06-92.94) | 92.77 (89.68-95.86) | 0.006 | -0.24 (-0.41 to -0.07) | 0.009 | -0.23 (-0.41 to -0.06) |
| **Male** | 88.18 (84.25-92.11) | 87.88 (83.23-92.54) | 85.94 (79.96-91.92) | 85.71 (75.75-95.66) | 85.81 (82.76-88.86) | 85.13 (79.76-90.5) | 86.6 (83.37-89.84) | 80.46 (73.07-87.85) | 0.083 | -0.26 (-0.55 to 0.03) | 0.029 | -0.32 (-0.61 to -0.03) |
| **Total** | **Total** | 91.42 (89.27-93.57) | 91.34 (88.72-93.95) | 91.08 (88.22-93.94) | 90.46 (85.09-95.83) | 86.9 (84.46-89.35) | 86.81 (83.29-90.32) | 88.61 (86.43-90.78) | 86.55 (82.52-90.59) | 0.003 | -0.23 (-0.39 to -0.08) | 0.001 | -0.26 (-0.41 to -0.1) |
| Data are presented as percentages (95% confidence interval). | | | | | | | | | | | | | |

**Table 4:** Crude and standardized prevalence of dyslipidemia in Iranian adults with diabetes from 2007 to 2021

|  | | **2007** | | **2011** | | **2016** | | **2021** | | **p-value for trend** | **Annual rate change (%)** | **p-value for trend (adjusted)** | **Annual rate change (adjusted) (%)** |
| --- | --- | --- | --- | --- | --- | --- | --- | --- | --- | --- | --- | --- | --- |
| **Prevalence** | | **Crude** | **Standardized** | **Crude** | **Standardized** | **Crude** | **Standardized** | **Crude** | **Standardized** |
| **Age categories (years)** | **25-34** | 35.59 (19.36-51.81) | 35.09 (23.81-46.38) | 37.99 (16.8-59.18) | 26.67 (12.43-40.9) | 26.09 (14.01-38.16) | 27.02 (14.58-39.45) | 38.3 (23.38-53.22) | 41.28 (25.98-56.58) | 0.651 | 0.68 (-2.22 to 3.66) | 0.834 | 0.32 (-2.67 to 3.41) |
| **35-44** | 35.61 (27.25-43.98) | 37.27 (28.91-45.63) | 52.32 (37.72-66.93) | 54.43 (42.31-66.55) | 35.91 (27.88-43.94) | 36.5 (28.35-44.65) | 34.39 (25.15-43.64) | 34.17 (26.03-42.31) | 0.113 | -1.24 (-2.76 to 0.3) | 0.124 | -1.2 (-2.71 to 0.33) |
| **45-54** | 45.42 (38.09-52.76) | 45.11 (38.4-51.82) | 36.82 (27.69-45.95) | 38.68 (28.72-48.65) | 42.67 (36.87-48.48) | 43.83 (38.13-49.54) | 38.98 (33.57-44.39) | 40.43 (34.76-46.09) | 0.295 | -0.52 (-1.49 to 0.46) | 0.339 | -0.48 (-1.45 to 0.5) |
| **55-64** | 37.9 (32.41-43.39) | 38.44 (33.03-43.85) | 43.87 (37.58-50.16) | 43.16 (36.87-49.45) | 39.17 (34.68-43.65) | 39.94 (35.46-44.43) | 37.97 (33.38-42.56) | 39.58 (34.88-44.27) | 0.567 | -0.24 (-1.06 to 0.59) | 0.672 | -0.18 (-1.01 to 0.65) |
| **Area** | **Rural** | 43.38 (34.22-52.54) | 47.21 (37.78-56.64) | 44.62 (34.44-54.79) | 41.86 (30.93-52.79) | 37.81 (32.47-43.15) | 32.73 (24.53-40.93) | 39.1 (33.43-44.78) | 42.97 (34.54-51.41) | 0.283 | -0.59 (-1.65 to 0.49) | 0.331 | -0.53 (-1.6 to 0.54) |
| **Urban** | 38.42 (33.44-43.4) | 35.34 (29.25-41.43) | 41.54 (35.4-47.68) | 38.79 (30.78-46.8) | 39.9 (36.09-43.71) | 35.96 (29.67-42.26) | 37.53 (33.81-41.25) | 37.57 (29.58-45.57) | 0.335 | -0.33 (-1.01 to 0.35) | 0.332 | -0.34 (-1.01 to 0.35) |
| **Sex** | **Female** | 38.13 (33.06-43.2) | 38.6 (31.04-46.15) | 37.78 (31.48-44.09) | 37.97 (30.06-45.87) | 35.62 (31.51-39.72) | 34.29 (26.68-41.89) | 34.38 (30.46-38.3) | 33.57 (24.4-42.75) | 0.097 | -0.67 (-1.45 to 0.12) | 0.111 | -0.64 (-1.43 to 0.15) |
| **Male** | 41.45 (34.05-48.84) | 37.72 (30.7-44.74) | 48.42 (39.32-57.52) | 40.87 (30.22-51.51) | 44.97 (39.96-49.99) | 36.07 (29.04-43.09) | 42.78 (37.37-48.18) | 44.03 (35.05-53.02) | 0.972 | -0.01 (-0.84 to 0.82) | 0.762 | -0.13 (-0.96 to 0.71) |
| **Total** | **Total** | 39.68 (35.28-44.08) | 38.15 (33-43.31) | 42.16 (36.85-47.47) | 39.46 (32.77-46.16) | 39.45 (36.24-42.65) | 35.19 (30.01-40.36) | 37.83 (34.62-41.03) | 38.85 (32.43-45.27) | 0.155 | -0.42 (-0.98 to 0.16) | 0.188 | -0.39 (-0.96 to 0.19) |
| Data are presented as percentages (95% confidence interval). | | | | | | | | | | | | | |

**Table 5:** Crude and standardized prevalence of overweight in Iranian adults with diabetes from 2007 to 2021

|  | | **2007** | | **2011** | | **2016** | | **2021** | | **p-value for trend** | **Annual rate change (%)** | **p-value for trend (adjusted)** | **Annual rate change (adjusted) (%)** |
| --- | --- | --- | --- | --- | --- | --- | --- | --- | --- | --- | --- | --- | --- |
| **Prevalence** | | **Crude** | **Standardized** | **Crude** | **Standardized** | **Crude** | **Standardized** | **Crude** | **Standardized** |
| **Age categories (years)** | **25-34** | 28.18 (15.37-41) | 33.06 (21.67-44.45) | 39.39 (17.17-61.61) | 40.61 (32.13-49.1) | 21.66 (10.68-32.65) | 26.03 (14.24-37.83) | 37.44 (22.62-52.27) | 29.81 (19.98-39.63) | 0.776 | 0.47 (-2.71 to 3.74) | 0.941 | 0.12 (-3 to 3.34) |
| **35-44** | 40.1 (30.92-49.27) | 38.16 (29.63-46.7) | 30.89 (18.17-43.61) | 28.27 (18.43-38.11) | 47.88 (39.54-56.21) | 45.67 (37.7-53.64) | 47.58 (38.11-57.04) | 48.28 (39.56-57) | 0.001 | 2.31 (0.88 to 3.75) | 0.002 | 2.24 (0.85 to 3.65) |
| **45-54** | 38.15 (31.45-44.85) | 37.44 (31.04-43.84) | 42.47 (33.63-51.3) | 36.79 (28.35-45.24) | 41.17 (35.74-46.61) | 39.25 (33.95-44.56) | 44.56 (38.97-50.16) | 42.45 (36.94-47.97) | 0.008 | 1.3 (0.34 to 2.28) | 0.023 | 1.11 (0.15 to 2.08) |
| **55-64** | 37.6 (31.83-43.37) | 36.53 (31.02-42.04) | 39.21 (33.07-45.36) | 40.92 (34.76-47.09) | 43.15 (38.55-47.76) | 41.32 (36.88-45.76) | 42.48 (37.77-47.19) | 40.48 (35.76-45.2) | <0.0001 | 1.64 (0.76 to 2.52) | 0.001 | 1.4 (0.54 to 2.27) |
| **Area** | **Rural** | 26.12 (19.98-32.25) | 21.34 (15.52-27.16) | 35.42 (25.56-45.28) | 44.37 (33.89-54.85) | 37.75 (32.35-43.16) | 27.79 (20.87-34.71) | 43.15 (37.4-48.9) | 40.11 (31.6-48.62) | <0.0001 | 2.18 (0.96 to 3.42) | 0.001 | 1.95 (0.75 to 3.16) |
| **Urban** | 40.69 (35.76-45.62) | 40.36 (33.8-46.93) | 39.92 (34.11-45.72) | 33.99 (28.81-39.17) | 43.36 (39.59-47.12) | 39.72 (33.59-45.84) | 43.8 (39.97-47.63) | 38.68 (33.15-44.21) | <0.0001 | 1.29 (0.63 to 1.96) | <0.0001 | 1.19 (0.55 to 1.85) |
| **Sex** | **Female** | 46.9 (41.65-52.15) | 45.01 (37.09-52.93) | 48.18 (41.84-54.52) | 53.06 (45.03-61.09) | 50.01 (45.74-54.28) | 47.9 (40.41-55.39) | 51.5 (47.35-55.64) | 47.41 (40.9-53.92) | 0.001 | 1.12 (0.47 to 1.77) | 0.002 | 1.02 (0.38 to 1.67) |
| **Male** | 25.68 (19.98-31.38) | 26.88 (20.12-33.63) | 25.9 (18.28-33.52) | 20.55 (15.59-25.5) | 30.77 (26.26-35.27) | 26.04 (19.58-32.49) | 32.45 (27.19-37.7) | 30.8 (24.09-37.5) | <0.0001 | 2.41 (1.24 to 3.61) | <0.0001 | 2.23 (1.04 to 3.42) |
| **Total** | **Total** | 37 (32.89-41.11) | 35.85 (30.66-41.05) | 39.02 (33.98-44.05) | 36.28 (31.63-40.93) | 42.13 (38.97-45.3) | 36.85 (31.91-41.79) | 43.68 (40.39-46.97) | 39.02 (34.35-43.7) | <0.0001 | 1.61 (1.03 to 2.2) | <0.0001 | 1.37 (0.8 to 1.94) |
| Data are presented as percentages (95% confidence interval). | | | | | | | | | | | | | |

**Table 6:** Crude and standardized prevalence of obesity in Iranian adults with diabetes from 2007 to 2021

|  | | **2007** | | **2011** | | **2016** | | **2021** | | **p-value for trend** | **Annual rate change (%)** | **p-value for trend (adjusted)** | **Annual rate change (adjusted) (%)** |
| --- | --- | --- | --- | --- | --- | --- | --- | --- | --- | --- | --- | --- | --- |
| **Prevalence** | | **Crude** | **Standardized** | **Crude** | **Standardized** | **Crude** | **Standardized** | **Crude** | **Standardized** |
| **Age categories (years)** | **25-34** | 53.11 (37.28-68.94) | 55.47 (45.93-65.02) | 59.45 (36.97-81.94) | 52.69 (46.79-58.59) | 49.61 (35.23-64) | 51.96 (42.86-61.07) | 52.24 (37.12-67.36) | 41.14 (30.19-52.1) | 0.189 | 1.31 (-0.64 to 3.31) | 0.908 | 0.1 (-1.65 to 1.89) |
| **35-44** | 58.88 (49.11-68.65) | 58.09 (49.1-67.08) | 67.1 (52.73-81.48) | 58.82 (48.93-68.71) | 70.57 (62.67-78.47) | 65.2 (58.17-72.23) | 72.28 (65.14-79.43) | 68.22 (60.82-75.62) | 0.079 | 0.78 (-0.09 to 1.65) | 0.04 | 0.77 (0.04 to 1.51) |
| **45-54** | 70.28 (62.8-77.76) | 65.85 (60.36-71.33) | 69.35 (59.85-78.86) | 60.63 (52.42-68.84) | 71.97 (66.56-77.38) | 66.4 (61.45-71.34) | 67.04 (61.59-72.5) | 63.19 (58.33-68.04) | 0.48 | 0.19 (-0.33 to 0.71) | 0.888 | -0.03 (-0.44 to 0.38) |
| **55-64** | 72.97 (68.22-77.72) | 68 (63.79-72.21) | 70.52 (64.72-76.32) | 70.99 (66.24-75.73) | 72.75 (68.48-77.02) | 68.09 (64.58-71.6) | 71.25 (66.31-76.19) | 67.86 (63.78-71.93) | 0.027 | 0.48 (0.05 to 0.92) | 0.042 | 0.36 (0.01 to 0.71) |
| **Area** | **Rural** | 64.24 (55.45-73.03) | 57.9 (51.35-64.45) | 74.74 (64.69-84.8) | 66.61 (59.12-74.09) | 74.88 (69.99-79.78) | 57.74 (48.88-66.6) | 74.58 (69.54-79.61) | 60.17 (52.15-68.2) | 0.001 | 0.93 (0.36 to 1.51) | 0.016 | 0.57 (0.11 to 1.03) |
| **Urban** | 66.12 (60.93-71.3) | 60.6 (54.9-66.31) | 67.12 (60.99-73.25) | 56.34 (51.62-61.05) | 70.23 (66.59-73.87) | 62.33 (57.89-66.77) | 67.91 (64.1-71.71) | 55.79 (50-61.59) | 0.07 | 0.34 (-0.03 to 0.71) | 0.283 | 0.16 (-0.13 to 0.46) |
| **Sex** | **Female** | 92.22 (89.12-95.32) | 86.22 (79.92-92.52) | 93.43 (89.72-97.14) | 94.2 (89.6-98.8) | 94.15 (91.55-96.75) | 91.8 (87.44-96.17) | 89.52 (87-92.05) | 77.47 (70.87-84.08) | 0.019 | -0.22 (-0.4 to -0.04) | 0.01 | -0.24 (-0.42 to -0.06) |
| **Male** | 35.13 (28.2-42.07) | 34.22 (27.46-40.97) | 33.12 (25.02-41.23) | 25.22 (18.7-31.73) | 38.49 (33.82-43.16) | 31.31 (24.67-37.95) | 39.95 (34.69-45.22) | 36.59 (29.6-43.59) | <0.0001 | 2.26 (1.29 to 3.24) | <0.0001 | 2.11 (1.14 to 3.1) |
| **Total** | **Total** | 65.64 (61.18-70.11) | 59.96 (55.34-64.58) | 68.65 (63.34-73.96) | 58.6 (54.57-62.63) | 71.24 (68.19-74.29) | 61.23 (57.24-65.22) | 69.18 (65.94-72.42) | 56.83 (52.02-61.65) | 0.002 | 0.5 (0.19 to 0.81) | 0.031 | 0.27 (0.02 to 0.53) |
| Data are presented as percentages (95% confidence interval). | | | | | | | | | | | | | |

**Table 7:** Crude and standardized prevalence of abdominal obesity in Iranian adults with diabetes from 2007 to 2021
